# Supplementary material for: A rolling phenotype in Crohn's disease
Source: PLoS One. 2017 Apr 6;12(4):e0174954. doi: 10.1371/journal.pone.0174954 (PMC5383106; doi:10.1371/journal.pone.0174954)
Supplement: S1 File — (CSV) [file pone.0174954.s001.csv]

5.005	2	1	23.7	1644-01-19	L1	L1	1	1	L1/L3	L1	B1	B2
12.001	0	1	21.7	1639-05-05	L3	L3	0	0	L1/L3	L2/L3	B2	B32
20.001	0	1	29.5	1640-05-03	L1	L1	0	1	L1/L3	L1	B3	B32
26.001	0	2	22.7	1639-11-30	L1	L1	0	0	L1/L3	L1	B2	B2
38.001	0	1	22.1	1640-07-28	L2	L2	0	0	L2	L2/L3	B1	B1
38.003	2	1	48.7	1646-01-27	L1	L1	0	0	L1/L3	L1	B2	B2
38.005	2	2	20.9	1645-12-01	L3	L3	0	0	L1/L3	L2/L3	B1	B2
47.003	2	1	50.3	1640-07-13	L1	L1	0	0	L1/L3	L1	B2	B2
76.012	2	2	39.7	1648-10-28	L1	L3	0	1	L1/L3	L1	B1	B1
83.001	0	2	13.9	1639-08-30	L3	L3	0	0	L1/L3	L2/L3	B1	B2
85.001	0	1	49.7	1641-01-25	L3	L3	1	1	L1/L3	L2/L3	B1	B1
119.001	0	2	31	1640-09-20	L1	L1	0	0	L1/L3	L1	B3	B3
120.001	1	1	23.5	1640-05-03	L3	L3	0	1	L1/L3	L2/L3	B1	B32
153.001	2	1	28.1	1641-09-04	L1	L1	0	0	L1/L3	L1	B1	B1
174.001	0	1	26.6	1641-09-28	L2	L2	0	0	L2	L2/L3	B1	B1
177.001	2	2	55	1641-10-17	L3	L3	0	0	L1/L3	L2/L3	B1	B2
181.001	0	1	42.4	1640-08-03	L1	L1	0	0	L1/L3	L1	B1	B2
197.001	0	1	24.2	1642-02-27	L1	L1	0	0	L1/L3	L1	B1	B2
201.001	1	1	43.6	1639-04-15	L1	L3	0	0	L1/L3	L1	B2	B32
211.001	0	1	71.4	1639-06-02	L2	L2	0	0	L2	L2/L3	B1	B1
216.001	0	2	42.5	1642-02-20	L1	L1	0	0	L1/L3	L1	B32	B32
217.001	0	2	26	1641-08-03	L1	L1	0	0	L1/L3	L1	B1	B1
218.001	0	1	27.3	1641-02-02	L2	L2	0	1	L2	L2/L3	B1	B1
222.001	0	1	24.9	1641-03-13	L2	L3	0	0	L2	L2/L3	B1	B2
227.001	2	2	33.6	1641-10-22	L1	L1	0	0	L1/L3	L1	B1	B1
241.001	1	2	34	1640-07-26	L1	L3	0	0	L1/L3	L1	B2	B32
242.016	1	2	16.6	1651-09-29	L3	L3	0	0	L1/L3	L2/L3	B1	B1
243.001	0	2	23.8	1642-06-19	L1	L1	0	0	L1/L3	L1	B2	B2
255.001	0	1	21.9	1642-07-05	L3	L3	0	1	L1/L3	L2/L3	B1	B1
261.001	0	2	16	1640-09-18	L3	L3	0	0	L1/L3	L2/L3	B1	B1
263.007	1	1	13.6	1641-09-12	L3	L3	0	0	L1/L3	L2/L3	B1	B2
269.007	2	2	7.4	1649-09-18	L3	L3	0	0	L1/L3	L2/L3	B1	B1
271.001	0	1	22.8	1639-07-19	L1	L3	0	1	L1/L3	L1	B2	B2
276.001	0	1	29	1639-09-13	L3	L3	0	0	L1/L3	L2/L3	B3	B32
282.011	1	2	13.5	1652-11-21	L2	L3	0	0	L2	L2/L3	B1	B1
308.001	0	1	37.9	1642-11-06	L3	L3	0	0	L1/L3	L2/L3	B1	B1
310.001	2	1	26.4	1642-11-13	L2	L3	0	0	L2	L2/L3	B1	B1
310.005	2	2	23.2	1640-11-29	L1	L1	0	0	L1/L3	L1	B2	B32
316.001	0	2	22.9	1643-02-21	L1	L1	0	0	L1/L3	L1	B2	B32
320.001	2	1	22.8	1643-02-03	L1	L3	0	0	L1/L3	L1	B1	B32
324.001	1	1	53.2	1642-07-04	L2	L2	1	1	L2	L2/L3	B3	B3
329.001	0	2	46.8	1642-12-13	L1	L1	0	0	L1/L3	L1	B1	B1
336.001	1	1	31.9	1642-12-08	L1	L3	0	0	L1/L3	L1	B1	B2
338.001	0	2	42.1	1637-08-21	missing	L2	0	0			B1	B1
342.001	0	1	37.1	1640-03-13	L3	L3	0	0	L1/L3	L2/L3	B3	B3
346.001	1	1	21.8	1641-09-05	L3	L3	0	0	L1/L3	L2/L3	B2	B2
365.001	0	1	22.8	1641-10-03	L3	L3	0	1	L1/L3	L2/L3	B1	B3
370.001	0	1	14.6	1640-03-03	L3	L3	0	0	L1/L3	L2/L3	B1	B1
373.001	1	1	15.8	1643-03-21	L3	L3	0	1	L1/L3	L2/L3	B1	B3
376.005	2	2	37.9	1643-02-27	L1	L1	0	0	L1/L3	L1	B1	B32
384.001	0	1	34.2	1640-02-10	L1	L3	0	0	L1/L3	L1	B2	B2
392.001	0	2	57.8	1639-10-27	L3	L3	0	0	L1/L3	L2/L3	B2	B2
459.001	1	1	12.4	1642-07-25	L3	L3	0	0	L1/L3	L2/L3	B1	B1
472.008	2	1	38.1	1644-04-22	L3	L1	0	0	L1/L3	L2/L3	B1	B2
484.001	0	1	73.5	1644-01-05	L1	L1	0	0	L1/L3	L1	B1	B1
500.001	0	1	19.2	1642-09-06	L3	L3	0	1	L1/L3	L2/L3	B1	B2
502.001	0	2	44.1	1642-09-07	L1	L1	0	0	L1/L3	L1	B3	B32
520.001	0	2	23	1642-08-29	L1	L1	0	0	L1/L3	L1	B1	B32
524.001	0	1	53	1642-08-21	L1	L1	0	0	L1/L3	L1	B2	B2
548.001	0	1	70	1642-10-02	L1	L1	0	0	L1/L3	L1	B1	B1
557.001	0	1	27.4	1644-07-28	L1	L3	0	0	L1/L3	L1	B2	B32
563.001	1	2	19.7	1643-08-20	L2	L2	0	1	L2	L2/L3	B1	B1
566.001	0	1	21.1	1642-08-28	L3	L3	0	1	L1/L3	L2/L3	B2	B32
574.001	1	1	15.3	1642-08-09	L3	L3	0	0	L1/L3	L2/L3	B1	B2
660.001	0	2	11.2	1640-01-09	L1	L3	0	1	L1/L3	L1	B1	B3
696.008	1	1	27.9	1642-12-05	L1	L1	0	1	L1/L3	L1	B1	B32
697.001	2	1	21.4	1644-09-24	L3	L3	0	1	L1/L3	L2/L3	B2	B2
697.005	2	1	25.3	1644-07-28	L3	L3	0	0	L1/L3	L2/L3	B1	B1
700.001	0	1	17.5	1644-04-19	L2	L3	0	0	L2	L2/L3	B2	B2
713.001	0	2	31.7	1640-09-14	L3	L3	0	1	L1/L3	L2/L3	B1	B1
720.001	1	2	22.3	1644-01-13	L1	L1	0	0	L1/L3	L1	B32	B32
731.001	0	2	23.8	1644-03-15	L3	L3	0	0	L1/L3	L2/L3	B1	B2
733.001	0	1	25.1	1639-06-25	L3	L3	0	0	L1/L3	L2/L3	B1	B1
735.001	0	1	27.6	1643-04-18	L1	L1	0	0	L1/L3	L1	B32	B32
757.001	0	1	33.3	1644-03-09	L1	L1	0	0	L1/L3	L1	B1	B1
766.001	0	1	24.2	1639-08-04	L2	L3	0	0	L2	L2/L3	B1	B3
767.001	0	2	16.9	1644-03-11	L1	L1	0	1	L1/L3	L1	B2	B32
782.001	0	2	48.8	1639-09-02	L2	L2	0	0	L2	L2/L3	B3	B3
801.001	0	2	32.6	1640-06-01	L1	L3	0	0	L1/L3	L1	B1	B2
817.001	0	2	19.4	1644-09-21	L3	L3	0	0	L1/L3	L2/L3	B2	B2
820.001	0	1	20	1643-07-03	L1	L1	0	0	L1/L3	L1	B3	B3
823.001	0	2	60.3	1643-03-28	L2	L2	0	0	L2	L2/L3	B1	B1
829.001	0	1	22.1	1641-05-11	L1	L3	0	1	L1/L3	L1	B1	B2
831.001	0	2	48.8	1644-08-17	L1	L1	0	0	L1/L3	L1	B1	B1
861.001	0	1	24.4	1644-06-23	L3	L1	0	0	L1/L3	L2/L3	B1	B2
864.001	0	2	24.7	1644-09-08	L2	L2	0	0	L2	L2/L3	B1	B1
869.001	0	1	77.6	1645-02-09	L2	L2	0	1	L2	L2/L3	B1	B2
872.001	0	2	30.6	1644-03-25	L2	L2	1	1	L2	L2/L3	B2	B2
874.001	0	2	19.1	1640-11-22	L3	L3	0	0	L1/L3	L2/L3	B1	B2
878.001	0	1	16.1	1645-03-11	L3	L3	0	1	L1/L3	L2/L3	B1	B2
879.001	0	2	31.9	1644-09-17	L1	L1	0	0	L1/L3	L1	B2	B32
882.001	0	1	32.2	1639-06-03	L3	L3	0	1	L1/L3	L2/L3	B1	B32
884.001	1	1	39.4	1645-07-22	L2	L2	0	0	L2	L2/L3	B1	B1
895.001	2	2	39.2	1645-08-30	L3	L3	0	0	L1/L3	L2/L3	B32	B32
898.001	0	2	17.4	1645-05-23	L1	L1	0	0	L1/L3	L1	B1	B32
904.001	0	1	17.5	1644-03-03	L2	L3	0	0	L2	L2/L3	B1	B1
906.001	1	1	19.3	1645-06-08	L1	L3	0	0	L1/L3	L1	B1	B3
917.001	0	2	36.4	1645-08-05	L1	L1	0	0	L1/L3	L1	B1	B1
919.001	0	1	24	1645-02-10	L3	L3	0	0	L1/L3	L2/L3	B2	B32
924.001	0	1	18.2	1645-01-08	L1	L1	0	0	L1/L3	L1	B2	B2
940.001	0	2	36.2	1645-10-28	L1	L1	0	0	L1/L3	L1	B32	B32
953.001	0	2	32.4	1645-11-22	L3	L3	0	0	L1/L3	L2/L3	B1	B1
954.001	0	1	19.7	1643-04-30	L3	L3	0	0	L1/L3	L2/L3	B1	B32
955.001	0	2	40.5	1642-06-04	L2	L3	0	1	L2	L2/L3	B1	B2
985.001	0	2	27.7	1645-08-30	L1	L1	0	0	L1/L3	L1	B1	B2
989.001	0	2	72.6	1644-05-11	L2	L2	1	1	L2	L2/L3	B1	B1
997.001	2	1	18.2	1645-06-29	L3	L3	0	1	L1/L3	L2/L3	B1	B1
1006.001	2	1	28.9	1643-09-30	L3	L3	0	0	L1/L3	L2/L3	B1	B1
1024.001	0	2	29.6	1646-02-17	L1	L3	0	0	L1/L3	L1	B3	B32
1052.001	1	2	19.7	1643-01-15	L2	L2	0	1	L2	L2/L3	B1	B1
1062.001	0	1	22.4	1646-02-17	L1	L1	0	0	L1/L3	L1	B1	B1
1086.001	0	1	41.3	1646-04-12	L2	L2	0	1	L2	L2/L3	B1	B1
1092.001	1	1	21.8	1642-01-03	L3	L3	0	1	L1/L3	L2/L3	B1	B1
1093.001	0	1	28.1	1642-09-06	L2	L3	0	0	L2	L2/L3	B1	B1
1160.001	0	2	23.5	1646-03-29	L1	L3	0	0	L1/L3	L1	B3	B3
1173.001	0	1	38.7	1646-03-30	L2	L3	0	0	L2	L2/L3	B1	B2
1174.001	0	2	16.5	1646-09-22	L1	L1	0	0	L1/L3	L1	B2	B2
1176.001	0	1	38.6	1640-04-14	L1	L1	0	0	L1/L3	L1	B2	B32
1178.001	0	1	21.5	1646-10-17	L3	L3	0	0	L1/L3	L2/L3	B1	B3
1200.001	2	2	40.5	1646-10-16	L1	L1	0	0	L1/L3	L1	B1	B1
1206.001	0	2	32.2	1640-02-03	L3	L3	0	0	L1/L3	L2/L3	B1	B1
1225.001	0	2	58.7	1647-02-09	L1	L1	1	1	L1/L3	L1	B1	B1
1232.001	0	2	8.4	1639-05-03	L1	L3	0	0	L1/L3	L1	B1	B32
1260.001	0	1	29.3	1643-01-08	L3	L3	0	0	L1/L3	L2/L3	B32	B32
1280.001	1	1	22	1646-04-02	L2	L2	0	1	L2	L2/L3	B1	B1
1281.001	0	2	17.8	1645-06-03	L3	L3	0	0	L1/L3	L2/L3	B2	B2
1292.001	0	2	24.8	1645-01-03	missing	missing	0	0			B1	B1
1293.001	0	1	55.5	1644-03-03	L1	L1	0	0	L1/L3	L1	B1	B1
1294.001	0	2	22.9	1639-09-03	L3	L3	1	1	L1/L3	L2/L3	B1	B2
1300.001	0	2	22.6	1645-01-03	L1	L3	0	0	L1/L3	L1	B1	B2
1304.001	1	1	29.1	1645-10-11	L1	L1	0	1	L1/L3	L1	B1	B1
1315.005	2	1	14.2	1640-12-21	L3	L3	0	1	L1/L3	L2/L3	B1	B3
1338.001	1	1	27.9	1647-12-20	L3	L3	0	0	L1/L3	L2/L3	B1	B1
1346.001	0	1	21.8	1641-05-03	L3	L3	0	0	L1/L3	L2/L3	B1	B1
1358.001	0	2	19	1646-10-16	L3	L3	0	0	L1/L3	L2/L3	B32	B32
1365.001	0	1	23.5	1648-05-19	L3	L3	0	0	L1/L3	L2/L3	B1	B1
1368.001	1	1	14.9	1646-12-25	L3	L3	0	0	L1/L3	L2/L3	B2	B2
1369.001	0	1	22.5	1644-01-21	L1	L1	0	0	L1/L3	L1	B1	B32
1370.001	0	1	66.9	1647-06-29	L1	L1	0	0	L1/L3	L1	B2	B2
1372.001	2	2	19.6	1639-01-12	L3	L3	0	1	L1/L3	L2/L3	B1	B2
1380.001	1	1	17.4	1644-05-11	L1	L1	0	0	L1/L3	L1	B3	B3
1383.001	1	1	23.4	1642-10-03	L1	L1	0	0	L1/L3	L1	B1	B1
1385.001	0	1	29.4	1642-09-03	L2	L3	0	1	L2	L2/L3	B1	B1
1397.001	0	2	27.5	1645-05-18	L1	L3	0	0	L1/L3	L1	B2	B32
1405.001	0	1	23.6	1643-01-03	L2	L2	0	1	L2	L2/L3	B1	B1
1411.001	0	1	42.6	1647-11-24	L3	L3	1	1	L1/L3	L2/L3	B1	B2
1419.001	0	2	66	1648-04-09	L2	L2	1	1	L2	L2/L3	B1	B1
1420.001	0	2	36.4	1648-11-03	L2	L3	0	0	L2	L2/L3	B1	B1
1421.001	0	1	30.1	1643-01-03	L1	L3	0	0	L1/L3	L1	B1	B2
1422.001	0	2	42.8	1639-11-02	L1	L1	0	0	L1/L3	L1	B1	B2
1423.001	1	2	12.1	1644-09-15	L2	L2	1	1	L2	L2/L3	B1	B2
1424.001	1	1	8.8	1648-05-29	L3	L3	0	0	L1/L3	L2/L3	B1	B1
1426.001	1	1	25.1	1642-03-22	L3	L3	0	0	L1/L3	L2/L3	B1	B32
1432.001	0	1	24.9	1649-02-06	L1	L1	0	0	L1/L3	L1	B3	B32
1441.001	0	1	23	1646-03-20	L3	L3	0	1	L1/L3	L2/L3	B1	B1
1447.001	2	1	20.4	1641-08-01	L1	L3	0	1	L1/L3	L1	B1	B2
1448.001	0	2	21.1	1648-06-12	L1	L1	0	0	L1/L3	L1	B2	B2
1459.001	2	2	15.4	1645-11-03	L3	L3	0	0	L1/L3	L2/L3	B1	B2
1461.001	0	1	20.5	1646-10-23	L1	L1	0	0	L1/L3	L1	B1	B2
1499.001	0	2	19.6	1639-02-05	L1	L1	0	1	L1/L3	L1	B1	B2
1501.001	0	1	15.9	1645-09-23	L3	L3	0	0	L1/L3	L2/L3	B3	B32
1503.001	0	2	31.6	1641-08-03	L1	L1	0	0	L1/L3	L1	B1	B32
1505.001	2	2	21.9	1649-07-08	L1	L3	0	0	L1/L3	L1	B1	B1
1505.004	0	1	23.7	1644-09-14	L3	L3	0	1	L1/L3	L2/L3	B1	B2
1514.001	0	2	50.7	1648-11-20	L1	L3	1	1	L1/L3	L1	B1	B1
1531.001	2	2	24	1649-11-16	L3	L3	0	0	L1/L3	L2/L3	B3	B3
1533.001	0	2	21.8	1647-02-26	L1	L1	0	0	L1/L3	L1	B1	B1
1537.001	2	1	36	1647-11-15	L1	L1	0	0	L1/L3	L1	B3	B32
1558.001	0	2	35.6	1649-10-12	L1	L1	0	0	L1/L3	L1	B2	B2
1567.001	0	1	42.8	1650-03-08	L1	L3	0	0	L1/L3	L1	B2	B2
1573.001	0	1	23.4	1639-07-05	L1	L1	0	0	L1/L3	L1	B2	B2
3259.001	0	2	32.3	1648-07-04	L3	L3	0	0	L1/L3	L2/L3	B2	B2
3330.001	0	2	26.2	1644-09-20	L1	L3	0	1	L1/L3	L1	B1	B32
3336.001	0	2	28.6	1647-05-31	L1	L1	0	0	L1/L3	L1	B1	B1
3502.001	0	2	13.9	1648-10-23	L3	L3	0	0	L1/L3	L2/L3	B1	B2
3541.001	0	1	9.2	1648-02-13	L3	L3	0	0	L1/L3	L2/L3	B1	B1
3546.001	2	2	11.2	1647-03-16	L3	L3	0	0	L1/L3	L2/L3	B1	B32
3546.002	2	1	31.9	1642-01-03	L2	L3	0	1	L2	L2/L3	B1	B32
3547.001	0	2	15.3	1649-12-23	L3	L3	0	1	L1/L3	L2/L3	B1	B1
3549.001	2	2	12.9	1647-07-09	L3	L3	0	0	L1/L3	L2/L3	B3	B3
3549.002	2	1	35.3	1651-11-30	L3	L3	0	0	L1/L3	L2/L3	B1	B1
3550.001	0	2	16	1650-07-24	L3	L3	0	0	L1/L3	L2/L3	B1	B1
3553.001	0	2	10.3	1649-05-08	L2	L2	0	0	L2	L2/L3	B1	B2
3558.001	0	2	12	1650-03-18	L3	L3	0	0	L1/L3	L2/L3	B1	B1
3579.001	0	2	18.7	1649-11-25	L1	L3	0	1	L1/L3	L1	B1	B2
3611.001	0	2	49.4	1649-11-03	L1	L1	1	1	L1/L3	L1	B2	B2
3617.001	0	2	24.8	1650-10-29	L3	L3	1	1	L1/L3	L2/L3	B1	B1
3620.001	1	1	8.4	1642-09-26	L2	L2	0	0	L2	L2/L3	B1	B2
3621.001	0	2	11.5	1648-06-17	L3	L3	0	0	L1/L3	L2/L3	B1	B1
3622.001	0	1	22	1643-01-29	L1	L3	1	1	L1/L3	L1	B1	B32
3627.001	0	2	21.2	1648-08-19	L2	L3	0	1	L2	L2/L3	B1	B2
3633.001	0	2	13.4	1651-01-13	L1	L1	1	1	L1/L3	L1	B1	B1
3654.001	2	1	23.4	1646-06-03	L3	L3	0	0	L1/L3	L2/L3	B1	B1
3658.001	1	1	25.2	1650-01-03	L1	L3	0	0	L1/L3	L1	B1	B1
3707.001	0	2	15	1647-08-24	L1	L1	0	1	L1/L3	L1	B1	B1
3738.001	0	2	12.8	1647-12-18	L1	L3	0	1	L1/L3	L1	B1	B1
3744.001	1	1	25.1	1648-09-19	L3	L3	0	1	L1/L3	L2/L3	B1	B1
3745.001	0	1	21.4	1651-05-16	L1	L1	0	0	L1/L3	L1	B2	B2
3747.001	0	2	40.1	1646-06-27	L2	L3	0	1	L2	L2/L3	B1	B2
3756.001	0	1	13.1	1652-06-13	L3	L3	0	0	L1/L3	L2/L3	B1	B1
3757.001	0	1	27.3	1646-04-17	L2	L2	0	1	L2	L2/L3	B1	B1
3765.001	1	2	11.3	1647-11-26	L1	L3	0	0	L1/L3	L1	B3	B32
3768.001	0	2	11.6	1646-10-03	L2	L3	0	0	L2	L2/L3	B1	B2
3769.001	0	2	13.8	1648-08-11	L1	L3	0	0	L1/L3	L1	B1	B2
3780.001	1	2	13.7	1650-04-12	L3	L3	0	1	L1/L3	L2/L3	B1	B2
3790.001	0	2	12.5	1651-02-17	L1	L1	0	0	L1/L3	L1	B32	B32
3808.001	0	2	12.5	1650-11-18	L1	L3	0	0	L1/L3	L1	B1	B3
3810.001	1	1	10.8	1651-06-30	L3	L3	0	0	L1/L3	L2/L3	B2	B2
3817.001	0	2	13.9	1650-01-13	L3	L3	0	0	L1/L3	L2/L3	B1	B32
3818.001	1	2	14.2	1646-01-09	L2	L3	0	1	L2	L2/L3	B1	B1
3835.001	0	1	34.3	1650-12-23	L2	L2	0	0	L2	L2/L3	B1	B1
3836.001	1	1	22.5	1641-02-03	L1	L1	1	1	L1/L3	L1	B1	B1
3837.001	2	1	19.4	1643-03-21	L1	L3	0	0	L1/L3	L1	B1	B1
3842.001	2	1	42.2	1649-11-30	L3	L3	0	0	L1/L3	L2/L3	B1	B1
3853.001	0	2	16.8	1651-06-22	L3	L3	1	1	L1/L3	L2/L3	B1	B1
3857.001	0	1	15.1	1651-03-30	L1	L1	0	0	L1/L3	L1	B32	B32
3874.001	0	1	29.2	1651-09-30	L3	L3	0	0	L1/L3	L2/L3	B2	B2
3883.001	0	1	35.2	1649-11-03	L3	L3	0	0	L1/L3	L2/L3	B1	B2
3886.001	0	2	12.5	1642-10-15	L2	L3	1	1	L2	L2/L3	B1	B32
3892.001	0	1	22.8	1650-12-02	L1	L1	0	0	L1/L3	L1	B2	B2
3894.001	0	1	21.9	1647-03-03	L2	L2	0	1	L2	L2/L3	B2	B32
3898.001	0	1	40.5	1646-09-28	L1	L1	0	0	L1/L3	L1	B1	B1
3907.001	0	1	55.2	1650-03-03	L2	L2	0	0	L2	L2/L3	B1	B1
3909.001	0	1	34.2	1646-11-03	L1	L1	0	0	L1/L3	L1	B3	B3
3915.001	0	1	26.5	1639-09-16	L3	L3	0	0	L1/L3	L2/L3	B2	B2
3916.001	0	1	26.3	1650-10-13	L3	L3	0	0	L1/L3	L2/L3	B1	B1
3934.001	0	1	11.7	1647-08-03	L3	L3	0	0	L1/L3	L2/L3	B1	B2
3936.001	0	1	30.2	1645-04-03	L1	L1	1	1	L1/L3	L1	B1	B1
3946.001	1	1	27.2	1650-01-26	L2	L3	1	1	L2	L2/L3	B1	B1
3947.001	0	2	34	1644-02-25	L2	L2	0	0	L2	L2/L3	B1	B1
3954.001	0	1	21.1	1651-09-22	L3	L3	0	0	L1/L3	L2/L3	B1	B2
3955.001	0	1	20	1650-10-21	L3	L3	0	0	L1/L3	L2/L3	B1	B3
3960.001	0	2	13.1	1652-03-15	L3	L3	1	1	L1/L3	L2/L3	B1	B3
3970.001	0	1	26	1646-04-07	L2	L2	0	1	L2	L2/L3	B1	B1
3971.001	1	1	17.4	1645-03-31	L1	L1	0	0	L1/L3	L1	B1	B32
3987.001	0	2	31.2	1643-11-27	L1	L1	0	0	L1/L3	L1	B2	B2
3997.001	1	2	13.7	1652-06-27	L1	L1	0	0	L1/L3	L1	B1	B1
3999.001	0	1	25.9	1644-07-27	L2	L3	0	0	L2	L2/L3	B1	B1
4000.001	0	2	13.2	1651-12-22	L1	L1	0	0	L1/L3	L1	B1	B2
4003.001	0	1	31.5	1649-07-28	L3	L3	0	1	L1/L3	L2/L3	B3	B3
4016.001	0	2	63	1651-01-13	L1	L1	0	0	L1/L3	L1	B2	B2
4027.001	2	2	29.1	1652-04-11	L1	L3	0	0	L1/L3	L1	B2	B32
4034.001	0	1	20.6	1651-10-13	L3	L3	0	1	L1/L3	L2/L3	B1	B1
4052.001	0	1	40.8	1642-01-03	L2	L3	0	1	L2	L2/L3	B1	B2
4065.001	2	1	18.6	1651-12-05	L1	L1	0	0	L1/L3	L1	B1	B1
4268.001	0	1	17.8	1649-12-11	L1	L3	0	0	L1/L3	L1	B3	B3
4280.001	1	1	19.4	1643-01-03	L2	L3	0	0	L2	L2/L3	B1	B2
4285.001	0	2	13.8	1652-09-04	L2	L3	0	0	L2	L2/L3	B1	B1
4290.001	0	1	14.1	1652-06-03	L3	L3	0	0	L1/L3	L2/L3	B1	B2
4296.001	0	1	35.6	1652-08-31	L3	L3	0	0	L1/L3	L2/L3	B2	B2
4310.001	0	1	54	1649-11-26	L1	L1	0	0	L1/L3	L1	B1	B1
4317.001	0	2	7.9	1652-11-21	L3	L3	1	1	L1/L3	L2/L3	B2	B2
4319.001	0	1	12.1	1652-11-12	missing	L1	0	0			B1	B1
4334.001	0	1	35.4	1649-02-03	L3	L2	0	0	L1/L3	L2/L3	B1	B1
4340.001	0	2	17.4	1651-05-19	L3	L3	0	1	L1/L3	L2/L3	B1	B1
4341.001	0	2	43.8	1647-10-19	L1	L1	0	0	L1/L3	L1	B1	B1
4384.001	0	1	44.2	1650-06-19	L2	L2	0	0	L2	L2/L3	B1	B1
4387.001	0	1	19.7	1649-10-19	L2	L2	0	1	L2	L2/L3	B1	B1
4388.001	0	2	20.3	1648-09-15	L1	L1	0	0	L1/L3	L1	B1	B2
4394.001	0	1	19.2	1647-03-03	L3	L3	0	0	L1/L3	L2/L3	B1	B32
4462.001	2	2	20.5	1653-01-16	L3	L3	0	0	L1/L3	L2/L3	B1	B1
4487.001	0	2	26.5	1653-02-03	L3	L3	0	0	L1/L3	L2/L3	B2	B2
4495.001	0	1	49.2	1650-07-29	L1	L1	0	0	L1/L3	L1	B3	B3
4499.001	0	1	36.7	1651-12-19	L1	L1	0	0	L1/L3	L1	B2	B2
4524.001	0	2	27	1653-02-25	L1	L1	0	0	L1/L3	L1	B1	B1
4527.001	1	1	25.8	1653-03-15	L1	L1	0	0	L1/L3	L1	B1	B2
4535.001	2	1	29.6	1652-03-08	L2	L3	0	1	L2	L2/L3	B1	B1
4563.001	0	1	29.8	1653-04-20	L3	L3	0	0	L1/L3	L2/L3	B1	B1
4575.001	1	2	19.9	1644-10-01	L3	L3	0	0	L1/L3	L2/L3	B1	B2
4580.001	0	2	28.9	1650-10-16	L3	L3	0	1	L1/L3	L2/L3	B1	B1
4581.001	0	1	23.5	1652-11-13	missing	L1	1	1			B1	B1
4582.001	0	1	20.1	1652-11-21	L1	L3	0	1	L1/L3	L1	B1	B1
4600.001	0	2	30.3	1651-06-30	L1	L1	0	0	L1/L3	L1	B3	B3
4612.001	0	1	33.9	1653-03-28	L3	L3	0	0	L1/L3	L2/L3	B1	B1
4626.001	0	1	29.2	1652-12-07	L3	L3	0	0	L1/L3	L2/L3	B1	B1
4655.001	0	1	37.7	1650-01-17	L1	L1	0	0	L1/L3	L1	B1	B1
4659.001	0	2	11.7	1653-05-04	L1	L1	0	0	L1/L3	L1	B1	B2
4661.001	0	2	11	1653-06-26	L3	L3	1	1	L1/L3	L2/L3	B1	B1
4692.001	1	1	50.3	1650-01-06	L1	L1	0	0	L1/L3	L1	B2	B2
4704.001	0	2	11.2	1653-09-26	L2	L2	1	1	L2	L2/L3	B1	B1
4726.001	1	2	13.4	1653-08-28	L3	L3	0	0	L1/L3	L2/L3	B1	B1
4768.001	0	1	18.7	1643-10-07	L2	L3	0	1	L2	L2/L3	B1	B2
4784.001	0	2	16.4	1649-05-05	L1	L3	0	0	L1/L3	L1	B2	B32
4841.001	0	1	33.9	1643-02-18	L2	L3	0	0	L2	L2/L3	B1	B32
4854.001	0	1	33.6	1649-06-09	L1	L1	1	1	L1/L3	L1	B1	B32
4856.001	0	2	14.2	1644-07-05	L3	L3	0	0	L1/L3	L2/L3	B1	B3
4866.001	0	2	30	1648-07-03	L3	L3	0	0	L1/L3	L2/L3	B2	B2
4876.001	0	2	48.2	1651-03-01	L3	L3	0	0	L1/L3	L2/L3	B1	B1
4911.001	0	1	17.3	1651-03-23	L1	L1	0	1	L1/L3	L1	B1	B2
4952.001	0	2	24.1	1650-11-15	L3	L3	0	0	L1/L3	L2/L3	B1	B2
5009.001	0	2	45.7	1654-04-23	L3	L3	0	0	L1/L3	L2/L3	B2	B2
5031.001	0	1	20.9	1645-09-21	L2	L2	0	0	L2	L2/L3	B1	B1
5036.001	0	1	17.7	1652-01-20	L1	L1	0	0	L1/L3	L1	B1	B2
5039.001	0	2	28.1	1654-06-27	L3	L3	1	1	L1/L3	L2/L3	B32	B32
5049.001	0	2	36.4	1647-03-07	L1	L1	0	1	L1/L3	L1	B1	B1
5054.001	0	1	30.1	1648-02-29	L1	L1	0	0	L1/L3	L1	B2	B32
5064.001	0	1	41.5	1649-10-13	L1	L1	0	0	L1/L3	L1	B1	B1
5086.001	0	2	21.5	1644-04-01	L2	L3	0	1	L2	L2/L3	B1	B2
5124.001	0	2	62	1652-09-06	L1	L1	0	0	L1/L3	L1	B2	B2
5125.001	0	1	43.6	1653-08-06	L1	L1	0	0	L1/L3	L1	B1	B1
6418.001	2	2	48	1646-01-03	L2	L2	1	1	L2	L2/L3	B1	B1
6419.001	0	2	14.8	1643-12-02	L2	L2	1	1	L2	L2/L3	B1	B1
6430.001	0	1	18.7	1645-06-03	L1	L1	0	0	L1/L3	L1	B1	B1
10221.001	1	1	25.2	1650-02-16	L2	L2	0	1	L2	L2/L3	B1	B1
10226.001	0	1	27.6	1649-01-07	L1	L3	0	1	L1/L3	L1	B1	B1
