# Supplementary material for: A rolling phenotype in Crohn's disease
Source: PLoS One. 2017 Apr 6;12(4):e0174954. doi: 10.1371/journal.pone.0174954 (PMC5383106; doi:10.1371/journal.pone.0174954)
Supplement: S3 File — (CSV) [file pone.0174954.s003.csv]

20.001	1640-04-17	6,10,6,17	1	radiology			fistula	1	1642-05-03	surgery	6,7,8
120.001	1650-10-12	6,8	1	surgery		6,7,8	fistula	2	1652-10-11	surgery	6,7,8
201.001	1642-10-24	9,17	1	surgery		9	fistula	3	1644-10-23	surgery	9
216.001	1643-10-12	6,6	1	surgery		6	fistula	4	1645-10-11	surgery	6
216.001	1652-06-05	6,5	1	radiology			fistula	5	1654-06-05	radiology
217.001	1641-07-05	888	1	colonoscopy			fistula	6	1643-07-05	colonoscopy
241.001	1654-06-17	6,7,6,7	1	surgery		6,7,8	fistula	7	1656-06-16	surgery	6,7,8
276.001	1639-09-13	7,8	1	surgery		6,7,8	fistula	8	1641-09-12	surgery	6,7,8
310.005	1649-09-09	6,15	1	radiology			fistula	9	1651-09-17	surgery	6
316.001	1651-11-25	6,11	1	radiology			fistula	10	1654-02-26	no_resolution
320.001	1652-09-05	6,10	1	radiology			fistula	11	1654-09-05	radiology
320.001	1657-08-07	6,10	1	radiology			fistula	12	1657-09-26	no_resolution
324.001	1642-07-04	888	1	colonoscopy			fistula	13	1644-07-11	radiology
365.001	1646-01-10	11,14	1	radiology			fistula	14	1648-01-10	radiology
376.005	1653-09-24	6,15	1	radiology			fistula	15	1656-09-09	no_resolution
459.001	1644-02-16	777	1	radiology			fistula	16	1646-02-15	radiology
472.008	1644-04-22	888	1	colonoscopy			fistula	17	1646-04-22	colonoscopy
502.001	1642-09-07	4,14	1	surgery		4,5	fistula	18	1644-09-06	surgery	4,5
520.001	1647-08-23	6,6,6,10	1	radiology			fistula	19	1649-07-10	no_resolution
557.001	1646-08-22	6,5,6,7,6,14	1	surgery		6,5,7	fistula	20	1648-08-21	surgery	6,5,7
566.001	1653-03-29	6,14	1	surgery		5,6,7	fistula	21	1655-03-29	surgery	5,6,7
660.001	1649-07-14	6,5	1	radiology			fistula	22	1651-07-14	radiology
713.001	1646-08-24	12,17,12,17,12,17	1	radiology			fistula	23	1647-10-30	no_resolution
735.001	1644-04-02	6,15	1	radiology			fistula	24	1646-08-13	surgery	6,7
766.001	1644-12-01	10,14	1	radiology			fistula	25	1647-07-13	surgery	6,7,8,9,10,11
767.001	1649-07-22	888	1	colonoscopy			fistula	26	1651-07-22	colonoscopy
882.001	1645-09-13	6,17	1	surgery		6	fistula	27	1647-09-13	surgery	6
895.001	1645-08-31	6,14	1	surgery		6,7	fistula	28	1647-08-31	surgery	6,7
906.001	1649-05-25	6,10	1	radiology			fistula	29	1651-06-10	surgery	6,10
954.001	1643-04-30	888	1	surgery		6,7,8	fistula	30	1646-09-07	surgery	6,7,8
1052.001	1654-03-14	12,17	1	surgery		12,11,10	fistula	31	1656-03-13	surgery	12,11,10
1176.001	1648-08-20	6,5	1	surgery		6,7	fistula	32	1650-08-20	surgery	6,7
1178.001	1652-06-01	10,18	1	radiology			fistula	33	1654-06-01	radiology
1232.001	1646-12-19	9,8	1	surgery		6,7,8,9	fistula	34	1648-12-18	surgery	6,7,8,9
1280.001	1657-11-10	12,17	1	surgery		12	fistula	35	1657-11-02	no_resolution
1300.001	1657-11-09	6,6	1	surgery		6,7,9	fistula	36	1657-11-08	no_resolution
1358.001	1647-06-05	5,8	1	surgery		5,6,7,8	fistula	37	1649-06-04	surgery	5,6,7,8
1369.001	1648-03-04	6,10	1	surgery		6,10	fistula	38	1650-03-04	surgery	6,10
1380.001	1644-08-05	6,6	1	surgery		6,7	fistula	39	1646-08-05	surgery	6,7
1426.001	1648-04-30	6,14,6,18	1	surgery		6	fistula	40	1650-04-30	surgery	6
1432.001	1649-07-14	6,6,6,7	1	radiology			fistula	41	1651-07-14	radiology
1501.001	1648-02-08	777	1	radiology			fistula	42	1650-02-07	radiology
1501.001	1653-07-29	6,6,6,10	1	surgery		6,7	fistula	43	1655-07-29	surgery	6,7
1537.001	1650-10-16	6,17	1	radiology			fistula	44	1652-11-08	surgery	6,7
3330.001	1654-01-27	6,6	1	radiology			fistula	45	1656-01-27	radiology
3546.001	1650-07-20	6,5	1	radiology			fistula	46	1652-11-07	surgery	6,7,8
3549.001	1647-08-06	7,17	1	radiology			fistula	47	1650-10-03	radiology
3622.001	1649-12-10	6888	1	colonoscopy			fistula	48	1651-08-23	no_resolution
3738.001	1648-08-18	888	1	colonoscopy			fistula	49	1650-08-18	colonoscopy
3765.001	1647-11-26	7,8	1	colonoscopy			fistula	50	1649-11-25	colonoscopy
3790.001	1651-01-10	6,17	1	radiology			fistula	51	1653-02-16	surgery	6,7,8
3886.001	1647-12-20	6,14,9,14	1	surgery		4,9	fistula	52	1649-12-19	surgery	4,9
3909.001	1647-09-18	6,15	1	surgery		6,7	fistula	53	1649-09-17	surgery	6,7
3915.001	1658-06-14	6,17	1	radiology			fistula	54	1653-06-26	no_resolution
3955.001	1652-02-29	6,9	1	surgery		6,7	fistula	55	1654-02-28	surgery	6,7
3960.001	1653-03-19	11	1	radiology			fistula	56	1655-03-19	radiology
3970.001	1652-06-08	11888	1	colonoscopy			fistula	57	1652-07-17	no_resolution
3971.001	1648-06-30	6,6	1	surgery		5,6,7,8	fistula	58	1650-06-30	surgery	5,6,7,8
4003.001	1650-08-04	6,17	1	radiology			fistula	59	1653-02-24	radiology
4027.001	1653-10-10	6,8	1	surgery		6,7,8	fistula	60	1655-10-10	surgery	6,7,8
4268.001	1649-12-07	777	1	radiology			fistula	61	1651-12-07	radiology
4280.001	1642-03-20	888	1	colonoscopy			fistula	62	1644-03-19	colonoscopy
4394.001	1652-12-21	6,5	1	radiology			fistula	63	1654-12-21	radiology
4394.001	1655-04-07	5,6	1	radiology			fistula	64	1657-04-09	surgery	6,7
4495.001	1651-09-29	6,10,6,11	1	surgery		6,7,10,11	fistula	65	1654-07-22	no_resolution
4600.001	1652-06-03	6,15	1	surgery		888	fistula	66	1654-06-03	surgery	888
4784.001	1653-08-15	6,14	1	radiology			fistula	67	1655-09-11	surgery	6,8
4841.001	1648-07-21	6,8	1	surgery		6,7,8,9	fistula	68	1650-07-21	surgery	6,7,8,9
4854.001	1653-11-04	10888	1	colonoscopy			fistula	69	1656-11-06	surgery	10
4856.001	1650-12-03	6,6	1	surgery		6,7	fistula	70	1652-12-02	surgery	6,7
5054.001	1655-09-11	6,7	1	surgery		6,7,8	fistula	71	1657-06-15	no_resolution
