# Supplementary material for: A rolling phenotype in Crohn's disease
Source: PLoS One. 2017 Apr 6;12(4):e0174954. doi: 10.1371/journal.pone.0174954 (PMC5383106; doi:10.1371/journal.pone.0174954)
Supplement: S4 File — (CSV) [file pone.0174954.s004.csv]

5.005	1645-02-09	6	1	colonoscopy			stenosis	1	1647-12-13	surgery	6,7
5.005	1657-05-30	6	1	surgery		6,7	stenosis	2	1657-08-15	no_resolution
12.001	1639-08-12	8	1	colonoscopy			stenosis	3	1641-08-11	colonoscopy
20.001	1647-03-13	6	1	colonoscopy			stenosis	4	1649-03-12	colonoscopy
20.001	1651-08-24	6	1	colonoscopy			stenosis	5	1651-09-23	no_resolution
26.001	1639-11-30	6	1	colonoscopy			stenosis	6	1641-11-29	colonoscopy
26.001	1642-08-27	6	1	surgery		6,7,8	stenosis	7	1644-08-26	surgery	6,7,8
26.001	1654-12-03	6	1	colonoscopy			stenosis	8	1655-12-22	no_resolution
38.003	1646-01-27	6	1	colonoscopy			stenosis	9	1648-01-27	colonoscopy
38.005	1653-05-14	6	1	radiology			stenosis	10	1655-05-14	radiology
47.003	1640-07-13	6	1	colonoscopy			stenosis	11	1642-07-13	colonoscopy
47.003	1646-08-14	6	1	colonoscopy			stenosis	12	1648-08-13	colonoscopy
47.003	1657-06-02	6	1	radiology			stenosis	13	1655-04-06	no_resolution
83.001	1651-09-30	5	1	radiology			stenosis	14	1653-09-29	radiology
120.001	1646-03-07	6	1	radiology			stenosis	15	1648-03-06	radiology
120.001	1650-08-16	6	1	radiology			stenosis	16	1652-10-11	surgery	6,7,8
177.001	1647-08-27	6	1	radiology			stenosis	17	1650-11-14	surgery	6,7
181.001	1642-09-22	6	1	surgery		6,7,8	stenosis	18	1644-09-21	surgery	6,7,8
181.001	1653-10-07	6	1	radiology			stenosis	19	1657-07-26	surgery	6,7
197.001	1652-01-20	6	1	radiology			stenosis	20	1654-01-22	surgery	6,7
201.001	1639-04-15	6	1	colonoscopy			stenosis	21	1641-04-14	colonoscopy
216.001	1642-11-27	4	1	surgery		4	stenosis	22	1644-11-26	surgery	4
216.001	1651-12-23	6	1	surgery		6	stenosis	23	1653-12-22	surgery	6
216.001	1654-03-27	6	1	colonoscopy			stenosis	24	1656-03-26	colonoscopy
217.001	1641-07-05	888	1	colonoscopy			stenosis	25	1643-07-05	colonoscopy
217.001	1643-10-13	6	1	radiology			stenosis	26	1645-10-12	radiology
222.001	1642-03-26	6	1	radiology			stenosis	27	1644-07-15	surgery	6,7
222.001	1647-02-02	6	1	colonoscopy			stenosis	28	1649-03-19	surgery	6,8
222.001	1650-08-10	6	1	colonoscopy			stenosis	29	1652-08-09	colonoscopy
241.001	1640-07-26	6	1	colonoscopy			stenosis	30	1644-06-04	colonoscopy
241.001	1644-07-16	8	1	colonoscopy			stenosis	31	1646-07-16	colonoscopy
243.001	1642-06-19	6	1	colonoscopy			stenosis	32	1645-09-29	surgery	6,7,8
261.001	1640-09-14	6	1	radiology			stenosis	33	1642-09-14	radiology
263.007	1647-07-05	6	1	colonoscopy			stenosis	34	1649-07-04	colonoscopy
271.001	1639-06-30	6	1	colonoscopy			stenosis	35	1641-06-29	colonoscopy
271.001	1642-09-12	6	1	radiology			stenosis	36	1644-09-12	surgery	6,7,8
276.001	1653-04-23	6	1	colonoscopy			stenosis	37	1656-01-21	surgery	6,8
310.005	1640-11-27	6	1	radiology			stenosis	38	1642-11-29	surgery	6,7
310.005	1645-12-16	6	1	colonoscopy			stenosis	39	1647-12-16	colonoscopy
310.005	1656-06-22	6	1	radiology			stenosis	40	1657-04-18	no_resolution
316.001	1643-02-21	6	1	colonoscopy			stenosis	41	1645-02-20	colonoscopy
316.001	1651-11-25	6	1	radiology			stenosis	42	1654-02-26	no_resolution
320.001	1652-03-22	6	1	colonoscopy			stenosis	43	1654-03-22	colonoscopy
324.001	1642-07-04	888	1	colonoscopy			stenosis	44	1644-07-11	radiology
336.001	1645-09-16	6	1	radiology			stenosis	45	1647-09-16	radiology
336.001	1648-03-27	6	1	colonoscopy			stenosis	46	1650-03-27	colonoscopy
336.001	1652-02-10	6	1	colonoscopy			stenosis	47	1654-12-17	radiology
346.001	1641-11-27	10	1	colonoscopy			stenosis	48	1643-11-27	colonoscopy
373.001	1643-03-18	6	1	radiology			stenosis	49	1645-03-17	radiology
376.005	1653-09-24	6	1	radiology			stenosis	50	1656-09-25	surgery	5,6,7,8
376.005	1657-06-01	6	1	radiology			stenosis	51	1656-09-09	no_resolution
384.001	1640-03-16	6	1	colonoscopy			stenosis	52	1642-03-28	surgery	6,7,8
384.001	1643-07-11	6	1	colonoscopy			stenosis	53	1645-07-10	colonoscopy
384.001	1645-08-18	6	1	colonoscopy			stenosis	54	1649-01-20	surgery	6,7
392.001	1639-09-03	10	1	colonoscopy			stenosis	55	1641-10-26	surgery	6,7,10,11
392.001	1654-05-02	6	1	colonoscopy			stenosis	56	1656-05-01	colonoscopy
459.001	1644-02-16	777	1	radiology			stenosis	57	1646-02-15	radiology
472.008	1644-04-22	888	1	colonoscopy			stenosis	58	1646-04-22	colonoscopy
472.008	1647-04-04	4	1	radiology			stenosis	59	1649-05-20	surgery	4,5,6
472.008	1649-09-27	4	1	surgery		4,5,6	stenosis	60	1651-09-27	surgery	4,5,6
472.008	1649-09-27	5	1	surgery		4,5,6	stenosis	61	1651-09-27	surgery	4,5,6
472.008	1649-09-27	6	1	surgery		4,5,6	stenosis	62	1651-09-27	surgery	4,5,6
472.008	1652-06-06	4	1	radiology			stenosis	63	1653-09-18	no_resolution
484.001	1643-11-12	6	1	radiology			stenosis	64	1645-11-11	radiology
500.001	1653-07-03	6	1	colonoscopy			stenosis	65	1655-07-03	colonoscopy
500.001	1656-05-10	6	1	colonoscopy			stenosis	66	1657-05-05	no_resolution
502.001	1648-01-29	6	1	radiology			stenosis	67	1650-03-21	surgery	6,7
502.001	1651-03-14	6	1	radiology			stenosis	68	1653-03-13	radiology
520.001	1648-02-14	6	1	colonoscopy			stenosis	69	1649-07-10	no_resolution
524.001	1642-08-21	6	1	surgery		6,7,8	stenosis	70	1644-08-20	surgery	6,7,8
524.001	1657-01-18	6	1	radiology			stenosis	71	1657-09-11	no_resolution
557.001	1644-07-28	6	1	colonoscopy			stenosis	72	1646-07-28	colonoscopy
557.001	1652-05-08	6	1	radiology			stenosis	73	1655-12-31	radiology
557.001	1657-05-16	5	1	radiology			stenosis	74	1657-06-15	no_resolution
566.001	1643-04-23	6	1	colonoscopy			stenosis	75	1645-04-22	colonoscopy
566.001	1651-08-16	6	1	colonoscopy			stenosis	76	1653-08-15	colonoscopy
574.001	1652-05-30	6	1	colonoscopy			stenosis	77	1654-07-25	surgery	6,7,8
696.008	1650-10-14	6	1	colonoscopy			stenosis	78	1652-10-25	radiology
696.008	1654-03-20	6	1	colonoscopy			stenosis	79	1656-03-19	colonoscopy
696.008	1656-12-16	6	1	colonoscopy			stenosis	80	1657-11-27	no_resolution
697.001	1644-09-24	6	1	colonoscopy			stenosis	81	1646-09-24	colonoscopy
700.001	1644-04-09	8	1	radiology			stenosis	82	1646-04-19	colonoscopy
700.001	1649-01-29	6	1	colonoscopy			stenosis	83	1651-04-24	surgery	6,7
700.001	1656-02-23	9	1	colonoscopy			stenosis	84	1657-07-31	no_resolution
720.001	1644-01-13	8	1	surgery		6,7	stenosis	85	1646-01-12	surgery	6,7
731.001	1656-11-07	6	1	colonoscopy			stenosis	86	1657-10-26	no_resolution
735.001	1643-04-18	6	1	colonoscopy			stenosis	87	1646-04-02	radiology
767.001	1644-03-08	6	1	colonoscopy			stenosis	88	1646-03-08	colonoscopy
767.001	1649-07-22	888	1	colonoscopy			stenosis	89	1651-07-22	colonoscopy
767.001	1657-05-15	6	1	colonoscopy			stenosis	90	1657-11-06	no_resolution
801.001	1643-11-24	6	1	colonoscopy			stenosis	91	1646-06-08	surgery	6,8
801.001	1649-07-23	6	1	colonoscopy			stenosis	92	1650-05-28	no_resolution
817.001	1644-09-21	6	1	surgery		6,7,8	stenosis	93	1646-09-21	surgery	6,7,8
829.001	1643-06-05	6	1	surgery		6,9	stenosis	94	1647-07-25	surgery	6,7
861.001	1649-11-02	6	1	colonoscopy			stenosis	95	1652-07-07	surgery	4,5
861.001	1654-08-26	6	1	radiology			stenosis	96	1656-08-25	radiology
869.001	1648-03-05	10	1	colonoscopy			stenosis	97	1650-03-05	colonoscopy
872.001	1644-03-25	11	1	colonoscopy			stenosis	98	1648-02-09	colonoscopy
874.001	1649-06-05	6	1	colonoscopy			stenosis	99	1649-09-16	no_resolution
878.001	1647-11-22	6	1	colonoscopy			stenosis	100	1649-11-21	colonoscopy
878.001	1651-09-09	6	1	colonoscopy			stenosis	101	1653-09-08	colonoscopy
878.001	1657-02-01	6	1	colonoscopy			stenosis	102	1657-04-24	no_resolution
879.001	1645-04-11	6	1	radiology			stenosis	103	1648-07-11	radiology
879.001	1650-09-15	6	1	colonoscopy			stenosis	104	1652-10-24	radiology
879.001	1655-01-21	6	1	radiology			stenosis	105	1656-11-07	no_resolution
882.001	1645-09-02	6	1	colonoscopy			stenosis	106	1647-09-02	colonoscopy
882.001	1651-05-26	4	1	surgery		4	stenosis	107	1653-05-25	surgery	4
882.001	1656-09-21	6	1	colonoscopy			stenosis	108	1658-02-07	no_resolution
895.001	1645-08-26	6	1	radiology			stenosis	109	1647-08-31	surgery	6,7
898.001	1656-04-06	6	1	radiology			stenosis	110	1658-03-05	no_resolution
919.001	1645-02-10	6	1	colonoscopy			stenosis	111	1647-08-12	radiology
924.001	1645-01-08	6	1	surgery		6,7,10	stenosis	112	1647-01-08	surgery	6,7,10
940.001	1645-10-23	6	1	radiology			stenosis	113	1647-10-28	surgery	6,7
954.001	1643-04-30	888	1	surgery		6,7,8	stenosis	114	1646-09-07	surgery	6,7,8
954.001	1653-11-15	6	1	colonoscopy			stenosis	115	1655-11-15	colonoscopy
954.001	1656-03-04	6	1	colonoscopy			stenosis	116	1658-03-04	colonoscopy
955.001	1651-02-02	9	1	colonoscopy			stenosis	117	1653-07-14	surgery	6,7,8,9,10
985.001	1647-08-16	6	1	colonoscopy			stenosis	118	1649-10-09	surgery	6,7
1024.001	1650-10-14	6	1	radiology			stenosis	119	1652-10-13	radiology
1173.001	1657-02-14	6	1	colonoscopy			stenosis	120	1657-09-18	no_resolution
1173.001	1657-02-14	8	1	colonoscopy			stenosis	121	1657-09-18	no_resolution
1174.001	1646-09-23	6	1	radiology			stenosis	122	1648-09-22	radiology
1176.001	1640-04-04	6	1	radiology			stenosis	123	1642-04-14	surgery	6,7
1176.001	1644-12-10	6	1	colonoscopy			stenosis	124	1650-08-20	surgery	6,7
1176.001	1652-01-26	6	1	radiology			stenosis	125	1654-06-22	surgery	6,7
1178.001	1652-06-01	888	1	radiology			stenosis	126	1654-06-01	radiology
1232.001	1646-11-06	6	1	radiology			stenosis	127	1650-12-14	surgery	6,7
1260.001	1643-01-08	6	1	surgery		6,7,8	stenosis	128	1645-01-07	surgery	6,7,8
1260.001	1654-12-16	6	1	radiology			stenosis	129	1655-07-17	no_resolution
1281.001	1646-02-23	6	1	colonoscopy			stenosis	130	1648-02-23	colonoscopy
1294.001	1642-08-12	6	1	surgery		6,7,8	stenosis	131	1644-08-11	surgery	6,7,8
1300.001	1647-08-28	6	1	surgery		6,7	stenosis	132	1649-08-27	surgery	6,7
1300.001	1657-05-30	10	1	colonoscopy			stenosis	133	1657-11-08	no_resolution
1358.001	1647-04-16	6	1	radiology			stenosis	134	1650-04-24	colonoscopy
1358.001	1650-04-30	6	1	colonoscopy			stenosis	135	1652-04-29	colonoscopy
1358.001	1652-10-01	6	1	radiology			stenosis	136	1654-10-01	radiology
1358.001	1655-02-27	6	1	surgery		6,8	stenosis	137	1657-09-13	no_resolution
1368.001	1646-12-02	6	1	radiology			stenosis	138	1648-12-13	surgery	6,7
1368.001	1656-04-26	6	1	colonoscopy			stenosis	139	1657-03-24	no_resolution
1369.001	1647-11-22	6	1	colonoscopy			stenosis	140	1650-03-04	surgery	6,10
1369.001	1651-08-18	6	1	colonoscopy			stenosis	141	1653-08-17	colonoscopy
1370.001	1647-06-29	6	1	colonoscopy			stenosis	142	1649-08-23	surgery	6,7,8
1372.001	1641-10-16	6	1	surgery		6,7	stenosis	143	1643-10-16	surgery	6,7
1397.001	1645-05-18	6	1	colonoscopy			stenosis	144	1647-05-18	colonoscopy
1397.001	1649-07-21	8	1	colonoscopy			stenosis	145	1650-06-28	no_resolution
1411.001	1652-07-06	6	1	radiology			stenosis	146	1654-07-06	radiology
1411.001	1654-08-01	6	1	surgery		6,10	stenosis	147	1656-07-31	surgery	6,10
1421.001	1646-05-11	6	1	colonoscopy			stenosis	148	1649-09-09	surgery	6,8
1421.001	1652-03-07	6	1	colonoscopy			stenosis	149	1654-03-07	colonoscopy
1421.001	1654-04-30	6	1	colonoscopy			stenosis	150	1658-01-28	surgery	6,8
1422.001	1641-05-10	6	1	surgery		6,7	stenosis	151	1643-05-10	surgery	6,7
1422.001	1647-12-18	6	1	radiology			stenosis	152	1650-12-19	surgery	6,7,8
1423.001	1648-10-13	10	1	surgery		6,7,8,9,10,11	stenosis	153	1650-10-13	surgery	6,7,8,9,10,11
1426.001	1648-04-29	6	1	radiology			stenosis	154	1650-04-30	surgery	6
1426.001	1652-08-24	5	1	radiology			stenosis	155	1654-08-24	radiology
1426.001	1656-06-01	5	1	radiology			stenosis	156	1658-02-03	no_resolution
1432.001	1649-07-14	6	1	radiology			stenosis	157	1651-07-14	radiology
1432.001	1651-11-28	6	1	radiology			stenosis	158	1654-09-14	surgery	6,7,8
1447.001	1649-06-19	6	1	colonoscopy			stenosis	159	1654-05-17	colonoscopy
1447.001	1655-07-21	6	1	radiology			stenosis	160	1657-04-13	no_resolution
1448.001	1648-06-12	6	1	surgery		6,7	stenosis	161	1650-06-12	surgery	6,7
1459.001	1649-07-16	9	1	radiology			stenosis	162	1651-07-24	surgery	6,7,9,10
1461.001	1649-03-12	6	1	colonoscopy			stenosis	163	1651-03-12	colonoscopy
1461.001	1652-09-25	6	1	surgery		6,7,8	stenosis	164	1654-09-25	surgery	6,7,8
1499.001	1646-08-25	6	1	colonoscopy			stenosis	165	1648-08-24	colonoscopy
1499.001	1650-02-02	6	1	surgery		6,7,8	stenosis	166	1652-02-02	surgery	6,7,8
1501.001	1652-04-18	6	1	colonoscopy			stenosis	167	1654-04-18	colonoscopy
1503.001	1647-07-05	6	1	radiology			stenosis	168	1649-07-04	radiology
1503.001	1652-02-27	6	1	radiology			stenosis	169	1654-04-10	surgery	6,7
1505.004	1653-09-16	6	1	colonoscopy			stenosis	170	1655-09-16	colonoscopy
1537.001	1651-05-06	6	1	colonoscopy			stenosis	171	1653-05-05	colonoscopy
1558.001	1649-09-14	4	1	radiology			stenosis	172	1652-01-21	colonoscopy
1558.001	1655-10-26	4	1	radiology			stenosis	173	1657-04-15	no_resolution
1567.001	1650-11-24	6	1	colonoscopy			stenosis	174	1655-03-31	radiology
1567.001	1656-08-24	6	1	radiology			stenosis	175	1657-02-22	no_resolution
1573.001	1639-08-26	6	1	surgery		6,7	stenosis	176	1641-08-25	surgery	6,7
1573.001	1657-07-24	5	1	radiology			stenosis	177	1658-01-17	no_resolution
3259.001	1648-07-08	6	1	colonoscopy			stenosis	178	1650-07-08	colonoscopy
3259.001	1655-08-14	6	1	radiology			stenosis	179	1657-08-24	surgery	6,7
3330.001	1653-01-23	6	1	colonoscopy			stenosis	180	1655-03-14	radiology
3502.001	1651-02-17	6	1	colonoscopy			stenosis	181	1653-02-16	colonoscopy
3546.001	1650-09-16	6	1	radiology			stenosis	182	1652-11-02	colonoscopy
3546.001	1653-09-27	6	1	colonoscopy			stenosis	183	1655-09-09	no_resolution
3546.002	1643-04-11	6	1	radiology			stenosis	184	1645-04-11	surgery	6,7,8
3546.002	1651-12-23	6	1	surgery		6,7	stenosis	185	1653-12-22	surgery	6,7
3549.001	1647-08-06	777	1	radiology			stenosis	186	1649-08-05	radiology
3549.001	1650-06-21	6	1	radiology			stenosis	187	1652-06-20	radiology
3553.001	1650-09-22	10	1	colonoscopy			stenosis	188	1652-09-21	colonoscopy
3579.001	1654-03-04	6	1	colonoscopy			stenosis	189	1656-03-03	colonoscopy
3611.001	1649-11-12	4	1	surgery		4,5,6	stenosis	190	1651-11-12	surgery	4,5,6
3611.001	1649-11-12	5	1	surgery		4,5,6	stenosis	191	1651-11-12	surgery	4,5,6
3611.001	1652-03-15	6	1	surgery		6	stenosis	192	1655-02-14	surgery	5,6
3611.001	1655-04-29	4	1	surgery		4,5	stenosis	193	1657-04-28	surgery	4,5
3611.001	1655-04-29	5	1	surgery		4,5	stenosis	194	1657-04-28	surgery	4,5
3620.001	1651-08-14	10	1	surgery		10,11	stenosis	195	1654-05-30	colonoscopy
3622.001	1648-08-06	6	1	colonoscopy			stenosis	196	1651-08-23	no_resolution
3627.001	1655-05-15	11	1	colonoscopy			stenosis	197	1656-08-01	no_resolution
3738.001	1648-08-18	888	1	colonoscopy			stenosis	198	1650-08-18	colonoscopy
3745.001	1651-07-08	6	1	surgery		6,7,8	stenosis	199	1653-07-07	surgery	6,7,8
3747.001	1654-07-25	11	1	colonoscopy			stenosis	200	1656-07-24	colonoscopy
3765.001	1650-04-26	6	1	colonoscopy			stenosis	201	1652-04-25	colonoscopy
3768.001	1653-06-13	6	1	colonoscopy			stenosis	202	1655-06-13	colonoscopy
3769.001	1653-01-21	6	1	colonoscopy			stenosis	203	1655-01-21	colonoscopy
3769.001	1655-10-19	6	1	colonoscopy			stenosis	204	1657-10-21	surgery	6,7,8
3780.001	1653-09-03	8	1	colonoscopy			stenosis	205	1655-09-03	colonoscopy
3790.001	1651-02-17	6	1	surgery		6,7,8	stenosis	206	1653-02-16	surgery	6,7,8
3810.001	1651-12-14	6	1	radiology			stenosis	207	1657-01-16	colonoscopy
3817.001	1658-01-12	6	1	radiology			stenosis	208	1658-04-13	no_resolution
3857.001	1651-04-05	6	1	colonoscopy			stenosis	209	1653-11-01	surgery	6,7
3874.001	1652-07-23	6	1	radiology			stenosis	210	1654-07-23	radiology
3883.001	1651-11-08	6	1	radiology			stenosis	211	1653-11-07	radiology
3886.001	1647-10-22	5	1	radiology			stenosis	212	1649-10-29	radiology
3886.001	1657-02-01	5	1	radiology			stenosis	213	1657-11-14	no_resolution
3892.001	1650-12-02	6	1	colonoscopy			stenosis	214	1652-12-01	colonoscopy
3894.001	1647-03-03	11	1	colonoscopy			stenosis	215	1649-03-02	colonoscopy
3894.001	1654-05-02	11	1	colonoscopy			stenosis	216	1656-05-01	colonoscopy
3894.001	1657-05-09	11	1	surgery		11,10,9,8,7,6	stenosis	217	1659-05-09	surgery	11,10,9,8,7,6
3915.001	1639-09-16	6	1	colonoscopy			stenosis	218	1643-08-14	colonoscopy
3915.001	1648-09-03	6	1	colonoscopy			stenosis	219	1650-09-08	surgery	6,5,4
3915.001	1650-09-23	5	1	colonoscopy			stenosis	220	1652-12-01	surgery	6,5
3915.001	1658-03-05	6	1	surgery		4,6	stenosis	221	1653-06-26	no_resolution
3934.001	1657-04-21	8	1	colonoscopy			stenosis	222	1658-01-26	no_resolution
3947.001	1652-06-04	8	1	radiology			stenosis	223	1654-06-04	radiology
3954.001	1655-02-25	6	1	radiology			stenosis	224	1657-02-24	radiology
3955.001	1651-12-24	6	1	radiology			stenosis	225	1653-12-23	radiology
3971.001	1652-11-23	6	1	colonoscopy			stenosis	226	1654-11-23	colonoscopy
3987.001	1643-09-18	6	1	colonoscopy			stenosis	227	1645-11-26	colonoscopy
3987.001	1650-04-08	6	1	colonoscopy			stenosis	228	1652-04-07	colonoscopy
3987.001	1655-05-21	6	1	colonoscopy			stenosis	229	1657-05-20	colonoscopy
4000.001	1654-06-14	6	1	radiology			stenosis	230	1656-06-13	radiology
4000.001	1656-09-29	6	1	colonoscopy			stenosis	231	1658-05-10	no_resolution
4003.001	1650-08-04	888	1	radiology			stenosis	232	1652-08-03	radiology
4016.001	1651-01-13	6	1	colonoscopy			stenosis	233	1653-01-12	colonoscopy
4016.001	1657-04-26	6	1	colonoscopy			stenosis	234	1657-05-26	no_resolution
4027.001	1652-04-11	6	1	colonoscopy			stenosis	235	1654-04-11	colonoscopy
4027.001	1656-04-14	6	1	colonoscopy			stenosis	236	1657-03-07	no_resolution
4052.001	1652-05-23	6	1	radiology			stenosis	237	1654-07-31	radiology
4052.001	1657-07-27	6	1	radiology			stenosis	238	1658-04-09	no_resolution
4268.001	1649-12-07	777	1	radiology			stenosis	239	1651-12-07	radiology
4280.001	1642-03-20	888	1	colonoscopy			stenosis	240	1644-03-19	colonoscopy
4280.001	1650-07-13	10	1	colonoscopy			stenosis	241	1654-03-30	colonoscopy
4290.001	1655-12-24	6	1	radiology			stenosis	242	1658-03-22	no_resolution
4296.001	1653-06-10	6	1	radiology			stenosis	243	1655-06-10	radiology
4317.001	1652-11-21	6	1	colonoscopy			stenosis	244	1654-11-21	colonoscopy
4388.001	1652-11-29	6	1	colonoscopy			stenosis	245	1654-11-29	colonoscopy
4388.001	1657-12-02	6	1	radiology			stenosis	246	1657-12-11	no_resolution
4394.001	1650-12-08	8	1	colonoscopy			stenosis	247	1652-12-07	colonoscopy
4394.001	1655-03-12	6	1	colonoscopy			stenosis	248	1657-03-11	colonoscopy
4487.001	1653-05-20	6	1	colonoscopy			stenosis	249	1656-04-23	colonoscopy
4495.001	1653-06-04	777	1	radiology			stenosis	250	1654-07-22	no_resolution
4499.001	1651-12-19	6	1	radiology			stenosis	251	1653-12-18	radiology
4527.001	1656-11-02	6	1	colonoscopy			stenosis	252	1658-07-16	no_resolution
4575.001	1653-08-22	6	1	radiology			stenosis	253	1655-12-12	surgery	6,7,8
4659.001	1657-03-28	4	1	colonoscopy			stenosis	254	1658-01-15	no_resolution
4692.001	1650-03-30	6	1	colonoscopy			stenosis	255	1655-02-18	colonoscopy
4692.001	1656-03-24	6	1	colonoscopy			stenosis	256	1657-10-13	no_resolution
4768.001	1646-01-09	6	1	surgery		6,7,8	stenosis	257	1648-01-09	surgery	6,7,8
4784.001	1649-09-04	6	1	colonoscopy			stenosis	258	1651-09-04	colonoscopy
4784.001	1653-08-15	777	1	radiology			stenosis	259	1655-08-18	radiology
4841.001	1648-06-26	8	1	colonoscopy			stenosis	260	1651-07-02	colonoscopy
4854.001	1652-07-05	6	1	colonoscopy			stenosis	261	1656-04-24	colonoscopy
4854.001	1652-07-05	10	1	colonoscopy			stenosis	262	1656-04-24	colonoscopy
4854.001	1657-01-25	6	1	radiology			stenosis	263	1658-05-25	no_resolution
4866.001	1648-10-29	6	1	colonoscopy			stenosis	264	1650-10-29	colonoscopy
4866.001	1653-11-19	6	1	radiology			stenosis	265	1654-02-10	no_resolution
4911.001	1656-09-06	6	1	colonoscopy			stenosis	266	1656-12-08	no_resolution
4952.001	1654-05-29	6	1	radiology			stenosis	267	1657-08-03	surgery	6,7,8
5009.001	1654-04-23	6	1	surgery		6,7	stenosis	268	1656-11-14	radiology
5036.001	1654-12-19	6	1	colonoscopy			stenosis	269	1657-01-29	surgery	6,7
5039.001	1654-06-27	6	1	colonoscopy			stenosis	270	1657-02-15	radiology
5039.001	1659-05-18	6	1	radiology			stenosis	271	1659-07-30	no_resolution
5054.001	1648-02-29	6	1	colonoscopy			stenosis	272	1650-02-28	colonoscopy
5054.001	1655-03-26	6	1	colonoscopy			stenosis	273	1657-03-25	colonoscopy
5086.001	1652-10-03	10	1	colonoscopy			stenosis	274	1654-10-23	surgery	10
5086.001	1657-08-18	10	1	colonoscopy			stenosis	275	1658-01-31	no_resolution
5124.001	1652-09-06	6	1	colonoscopy			stenosis	276	1657-11-03	no_resolution
